# Supplementary material
Source: ML conference proceedings conference paper supplement (https://openreview.net/forum?id=MxR3uzejdO)
Supplement: supplementary_material [file 4.doc]

Update command for running HiP-BMDP model.
